# Supplementary material for: Time-Course Transcriptome Profiling of a Poxvirus Using Long-Read Full-Length Assay
Source: MDPI journal article supplement (doi:10.3390/pathogens10080919), 2021-07-21
Supplement: s1 [file s1]

| GENE      | TRANSCRIPT      | STRAND | LENGTH (bp) | Relative abundance of 3' UTR isoforms |         |          |         |         |          |         |
|-----------|-----------------|--------|-------------|---------------------------------------|---------|----------|---------|---------|----------|---------|
|           |                 |        |             | 1h                                    | 2h      | 3h       | 4h      | 6h      | 8h       | 12h     |
| C11R      | C11R            | +      | 486         | 0                                     | 0.06667 | 0        | 0       | 0       | 0        | 0       |
|           | C11R-AT1        | +      | 515         | 0.6                                   | 0.86667 | 0.6      | 0.5     | 0.71429 | 1        | 0.58333 |
|           | C11R-AT2        | +      | 529         | 0.4                                   | 0.06667 | 0.4      | 0.5     | 0.14286 | 0        | 0.41667 |
|           | C11R-AT3        | +      | 551         | 0                                     | 0       | 0        | 0       | 0.14286 | 0        | 0       |
| C10L      | C10L            | -      | 1046        | 0.666667                              | 0.2     | 1        | 0.8     | 0.33333 | 1        | 0.5     |
|           | C10L-AT1        | -      | 1057        | 0.166667                              | 0.6     | 0        | 0.2     | 0.33333 | 0        | 0.125   |
|           | C10L-AT2        | -      | 1079        | 0                                     | 0       | 0        | 0       | 0       | 0        | 0.125   |
|           | C10L-AT3        | -      | 1102        | 0.166667                              | 0       | 0        | 0       | 0       | 0        | 0       |
|           | C10L-AT4        | -      | 1115        | 0                                     | 0.2     | 0        | 0       | 0.33333 | 0        | 0.25    |
| VACWR_15  | VACVWR_15       | -      | 304         | 0.5                                   | 0.15789 | 0.142857 | 0.2     | 0.08333 | 0.333333 | 0.23077 |
|           | VACVWR_15-AT1   | -      | 318         | 0.5                                   | 0.15789 | 0.142857 | 0.26667 | 0.33333 | 0.166667 | 0.15385 |
|           | VACVWR_15-L     | -      | 384         | 0                                     | 0.26316 | 0.142857 | 0.26667 | 0.16667 | 0        | 0.53846 |
|           | VACVWR_15-AT1-I | -      | 398         | 0                                     | 0.42105 | 0.571429 | 0.26667 | 0.41667 | 0.5      | 0.07692 |
| C6L       | C6L             | -      | 546         | 0                                     | 1       | 1        | 1       | 0.5     | 1        | 0.66667 |
|           | C6L-AT1         | -      | 559         | 0                                     | 0       | 0        | 0       | 0.25    | 0        | 0.33333 |
|           | C6L-C7L         | -      | 1286        | 0                                     | 0       | 0        | 0       | 0.25    | 0        | 0       |
| C5L       | C5L             | -      | 697         | 1                                     | 1       | 1        | 1       | 1       | 1        | 0.8     |
|           | C5L-C6L         | -      | 1263        | 0                                     | 0       | 0        | 0       | 0       | 0        | 0.2     |
| C4L       | C4L             | -      | 1041        | 0                                     | 0.5     | 0        | 0       | 0       | 0        | 0       |
|           | C4L-AT1         | -      | 1156        | 0                                     | 0.5     | 0        | 0       | 0       | 0        | 0       |
| N1L       | N1L-C1L         | -      | 1088        | 0                                     | 0       | 0        | 0       | 0       | 0.2      | 0       |
|           | N1L-C1L-I       | -      | 1133        | 1                                     | 1       | 1        | 1       | 0.25    | 0.8      | 0       |
|           | N1L-C1L-AT1     | -      | 1181        | 0                                     | 0       | 0        | 0       | 0.25    | 0        | 0       |
|           | N1L-C1L-I-AT1   | -      | 1226        | 0                                     | 0       | 0        | 0       | 0.25    | 0        | 0       |
|           | N1L-C1L-C2L     | -      | 2709        | 0                                     | 0       | 0        | 0       | 0.25    | 0        | 0       |
| K1L       | K1L             | -      | 921         | 0.9375                                | 0.25    | 0.833333 | 1       | 0.85714 | 0.8      | 1       |
|           | K1L-AT1         | -      | 951         | 0.0625                                | 0.375   | 0        | 0       | 0       | 0        | 0       |
|           | K1L-I           | -      | 1192        | 0                                     | 0       | 0.166667 | 0       | 0.14286 | 0        | 0       |
|           | K1L-AT1-I       | -      | 1222        | 0                                     | 0.25    | 0        | 0       | 0       | 0        | 0       |
|           | K1L-AT2-I       | -      | 1244        | 0                                     | 0       | 0        | 0       | 0       | 0.2      | 0       |
|           | K1L-M2L         | -      | 1743        | 0                                     | 0.125   | 0        | 0       | 0       | 0        | 0       |
| K7R       | K7R             | +      | 493         | 0.8                                   | 0.84615 | 1        | 1       | 1       | 1        | 0       |
|           | K7R-AT          | +      | 522         | 0.2                                   | 0.15385 | 0        | 0       | 0       | 0        | 0       |
| F1L       | F1L             | -      | 855         | 0                                     | 0.0303  | 0.25     | 0       | 0       | 0.055556 | 0       |
|           | F1L-AT3         | -      | 896         | 0.090909                              | 0       | 0        | 0       | 0       | 0        | 0       |
| F2L       | F2L-F1L-AT1     | -      | 1138        | 0                                     | 0.06061 | 0        | 0       | 0.07143 | 0        | 0       |
|           | F2L-F1L         | -      | 1170        | 0.727273                              | 0.78788 | 0.75     | 0.71429 | 0.64286 | 0.666667 | 1       |
|           | F2L-F1L-AT2     | -      | 1188        | 0                                     | 0.06061 | 0        | 0       | 0       | 0.111111 | 0       |
|           | F2L-F1L-AT3     | -      | 1211        | 0.181818                              | 0.0303  | 0        | 0.14286 | 0.07143 | 0.111111 | 0       |
|           | F2L-F1L-AT4     | -      | 1223        | 0                                     | 0.0303  | 0        | 0       | 0.14286 | 0.055556 | 0       |
|           | F2L-F1L-AT5     | -      | 1254        | 0                                     | 0       | 0        | 0.14286 | 0.07143 | 0        | 0       |
| F4L       | F4L             | -      | 986         | 0.8                                   | 0.82353 | 1        | 0.5     | 0.85714 | 0.888889 | 0.875   |
|           | F4L-AT1         | -      | 1000        | 0.2                                   | 0.17647 | 0        | 0.5     | 0.14286 | 0.111111 | 0.125   |
| F5L       | F5L             | -      | 1401        | 0                                     | 0       | 0        | 0       | 0       | 0        | 0.5     |
|           | F5L-F4L         | -      | 1982        | 1                                     | 0       | 0        | 0       | 0       | 1        | 0.5     |
| VACWR_43R | VACVWR_43       | -      | 320         | 0.7                                   | 0.72727 | 0.875    | 0.91667 | 0.5     | 0.75     | 0.75    |
|           | VACVWR_43-AT2   | -      | 333         | 0.3                                   | 0.24242 | 0.125    | 0.08333 | 0.5     | 0.25     | 0.25    |

|                   |                    |   |      |          |         |          |         |         |          |         |
|-------------------|--------------------|---|------|----------|---------|----------|---------|---------|----------|---------|
|                   | VACVWR_43-F6L      | - | 553  | 0        | 0.0303  | 0        | 0       | 0       | 0        | 0       |
| F14L              | F14L               | - | 280  | 0.5      | 0.77778 | 1        | 0.75    | 0       | 1        | 1       |
|                   | F14L-AT2           | - | 313  | 0        | 0.11111 | 0        | 0.25    | 0       | 0        | 0       |
| F15L              | F15L               | - | 517  | 0        | 0.11111 | 0        | 0       | 0       | 0        | 0       |
|                   | F15L-F14.5L-F14L   | - | 996  | 0.5      | 0       | 0        | 0       | 0       | 0        | 0       |
| E3L               | E3L-AT1            | - | 663  | 0        | 0       | 0        | 0.07692 | 0       | 0        | 0.125   |
|                   | E3L-AT2            | - | 680  | 0        | 0       | 0.083333 | 0.07692 | 0.08333 | 0        | 0       |
|                   | E3L                | - | 695  | 0.857143 | 0.82143 | 0.916667 | 0.69231 | 0.66667 | 0.875    | 0.875   |
|                   | E3L-AT3            | - | 723  | 0        | 0.03571 | 0        | 0       | 0       | 0        | 0       |
|                   | E3L-AT4            | - | 737  | 0        | 0       | 0        | 0.07692 | 0       | 0.125    | 0       |
|                   | E3L-AT7            | - | 848  | 0        | 0       | 0        | 0       | 0.08333 | 0        | 0       |
| E4L               | E4L-E3L-AT1        | - | 1507 | 0        | 0.03571 | 0        | 0       | 0       | 0        | 0       |
|                   | E4L-E3L            | - | 1522 | 0.142857 | 0.10714 | 0        | 0.07692 | 0.16667 | 0        | 0       |
| O1.2L             | O1.2L-AT2          | - | 429  | 0        | 0       | 0        | 0       | 0.33333 | 0        | 0       |
|                   | O1.2L-AT1          | - | 451  | 0        | 0       | 0        | 0       | 0       | 0        | 1       |
|                   | O1.2L              | - | 462  | 0        | 0.11111 | 0.25     | 0       | 0.33333 | 0        | 0       |
| O1L               | O1L-AT1            | - | 2046 | 0        | 0.22222 | 0        | 0       | 0       | 0.333333 | 0       |
|                   | O1L                | - | 2057 | 1        | 0.66667 | 0.75     | 1       | 0.33333 | 0.66667  | 0       |
| I3L               | I3L                | - | 1031 | 1        | 1       | 1        | 0       | 0       | 0.5      | 0       |
|                   | I3L-AT2            | - | 1044 | 0        | 0       | 0        | 0       | 0       | 0.5      | 0       |
| L2R               | L2R                | + | 289  | 0        | 1       | 0        | 0       | 1       | 0        | 1       |
|                   | L2R-AT1            | + | 538  | 1        | 0       | 0        | 0       | 0       | 0        | 0       |
| J2R               | J2R                | + | 590  | 0.66667  | 0.55556 | 1        | 0.5     | 0.72727 | 1        | 0.6     |
|                   | J2R-AT1            | + | 605  | 0.333333 | 0.11111 | 0        | 0.25    | 0.09091 | 0        | 0.4     |
|                   | J2R-AT2            | + | 628  | 0        | 0.33333 | 0        | 0.25    | 0.09091 | 0        | 0       |
|                   | J2R-AT3            | + | 708  | 0        | 0       | 0        | 0       | 0.09091 | 0        | 0       |
| H5R               | H5R                | + | 736  | 0.8      | 0.625   | 0.5      | 0.64    | 0.71429 | 0.772727 | 0.28571 |
|                   | H5R-AT1            | + | 758  | 0.2      | 0.325   | 0.428571 | 0.32    | 0.19048 | 0.181818 | 0.57143 |
|                   | H5R-AT3            | + | 899  | 0        | 0.025   | 0.071429 | 0.04    | 0.09524 | 0.045455 | 0.14286 |
|                   | H5R-AT4            | + | 912  | 0        | 0.025   | 0        | 0       | 0       | 0        | 0       |
| D7R               | D7R                | + | 519  | 0        | 0.75    | 0        | 0       | 0       | 1        | 0       |
|                   | D7R-AT             | + | 542  | 1        | 0.25    | 0        | 0       | 0       | 0        | 1       |
| A12.2L-as-nc-A11R | A12.2L-as-nc-A11R  | - | 190  | 0        | 0       | 0        | 1       | 0       | 0        | 0       |
|                   | A12.2L-as-nc-A11R- | - | 333  | 0        | 0       | 0        | 0       | 1       | 0        | 0       |
| A33R              | A33R               | + | 616  | 0.7      | 0.82609 | 0.75     | 0.33333 | 0.6     | 1        | 0.86667 |
|                   | A33R-AT1           | + | 651  | 0.3      | 0.17391 | 0.25     | 0.66667 | 0.2     | 0        | 0.13333 |
|                   | A33R-AT2           | + | 705  | 0        | 0       | 0        | 0       | 0.2     | 0        | 0       |
| A35R              | A35R               | + | 570  | 0        | 0.85714 | 1        | 1       | 0.33333 | 1        | 0       |
|                   | A35R-AT1           | + | 587  | 0        | 0.14286 | 0        | 0       | 0.66667 | 0        | 0       |
| A37R              | A37R-AT3           | + | 952  | 0        | 0       | 0.25     | 0       | 0       | 0        | 0.25    |
|                   | A37R               | + | 976  | 0.583333 | 0.76    | 0.75     | 0.5     | 0.5     | 0.5      | 0.5     |
|                   | A37R-AT1           | + | 1019 | 0.166667 | 0.2     | 0        | 0.25    | 0.25    | 0        | 0.25    |
|                   | A37R-AT2           | + | 1034 | 0.083333 | 0       | 0        | 0       | 0       | 0        | 0       |
|                   | A37R-AT6           | + | 1069 | 0.166667 | 0       | 0        | 0       | 0.125   | 0.5      | 0       |
|                   | A37R-AT7           | + | 1100 | 0        | 0.04    | 0        | 0.125   | 0       | 0        | 0       |
|                   | A37R-VACVWR_161    | + | 1125 | 0        | 0       | 0        | 0.125   | 0       | 0        | 0       |
|                   | A37R-VACVWR_161    | + | 1184 | 0        | 0       | 0        | 0       | 0.125   | 0        | 0       |
| A37.5R            | A37.5R             | + | 401  | 0        | 0       | 0        | 0.1     | 0       | 0        | 0       |
|                   | A37.5R-AT          | + | 525  | 0        | 0       | 0        | 0.1     | 0       | 0        | 0       |

|           |                   |   |      |          |         |          |         |         |          |         |
|-----------|-------------------|---|------|----------|---------|----------|---------|---------|----------|---------|
| VACWR_161 | VACVWR_161-I-AT1  | + | 231  | 0        | 0.5     | 0.5      | 0       | 0       | 0        | 0       |
|           | VACVWR_161-I      | + | 338  | 0        | 0       | 0        | 0       | 0       | 0        | 0.66667 |
|           | VACVWR_161-I-AT3  | + | 367  | 0        | 0       | 0.5      | 0       | 0       | 0        | 0       |
|           | c-VACVWR_161-I-A3 | + | 1083 | 0        | 0.5     | 0        | 0       | 0       | 0        | 0.33333 |
| A40R      | A40R-AT1          | + | 535  | 0        | 0       | 0        | 0       | 0       | 0        | 0.33333 |
|           | A40R              | + | 552  | 0        | 1       | 0        | 1       | 1       | 1        | 0.66667 |
| VACWR_169 | VACVWR_169        | + | 295  | 1        | 0.92857 | 0.833333 | 1       | 1       | 1        | 1       |
|           | VACVWR_169-AT1    | + | 357  | 0        | 0.07143 | 0.166667 | 0       | 0       | 0        | 0       |
| A46R      | A46R              | + | 744  | 0.4      | 0       | 0        | 0       | 0       | 0        | 0       |
|           | A46R-AT1          | + | 771  | 0.6      | 1       | 1        | 0       | 1       | 1        | 1       |
| A51R      | A51R-AT2          | + | 1041 | 0        | 0.66667 | 0.5      | 0       | 0       | 0        | 0.5     |
|           | A51R              | + | 1057 | 1        | 0.33333 | 0.5      | 0.75    | 1       | 1        | 0       |
|           | A51R-AT5          | + | 1118 | 0        | 0       | 0        | 0.25    | 0       | 0        | 0.5     |
| B2R       | B2R               | + | 807  | 0        | 0       | 0        | 0       | 0       | 0.166667 | 0       |
|           | B2R-VACVWR_187-/  | + | 1635 | 0.166667 | 0       | 0        | 0       | 0       | 0        | 0       |
|           | B2R-VACVWR_187    | + | 1732 | 0.666667 | 1       | 0        | 1       | 0       | 0.666667 | 0       |
|           | B2R-VACVWR_187-/  | + | 1792 | 0.166667 | 0       | 0        | 0       | 0       | 0.166667 | 1       |
| B8R       | B8R               | + | 885  | 0.6      | 0.81395 | 1        | 0.93103 | 0.91667 | 0.785714 | 0.94286 |
|           | B8R-AT3           | + | 1089 | 0        | 0       | 0        | 0       | 0.08333 | 0        | 0.02857 |
| B13R      | B13R-AT1          | + | 1108 | 0        | 0.08333 | 0        | 0       | 0       | 0        | 0.5     |
|           | B13R              | + | 1151 | 1        | 0.91667 | 0.5      | 1       | 0       | 1        | 0.5     |
|           | B13R-AT2          | + | 1168 | 0        | 0       | 0.5      | 0       | 0       | 0        | 0       |
| B19R      | B19R              | + | 1117 | 1        | 1       | 1        | 1       | 1       | 0.961538 | 0.97143 |
|           | B19R-AT1          | + | 1168 | 0        | 0       | 0        | 0       | 0       | 0        | 0.02857 |
|           | B19R-AT2          | + | 1290 | 0        | 0       | 0        | 0       | 0       | 0.038462 | 0       |
| C10L      | C10L              | + | 1046 | 0.833333 | 0.92857 | 1        | 0.9     | 0.33333 | 1        | 0.5     |
|           | C10L-AT1          | + | 1057 | 0        | 0       | 0        | 0.1     | 0.33333 | 0        | 0.125   |
|           | C10L-AT2          | + | 1089 | 0        | 0       | 0        | 0       | 0       | 0        | 0.125   |
|           | C10L-AT3          | + | 1102 | 0.166667 | 0       | 0        | 0       | 0       | 0        | 0       |
|           | C10L-AT4          | + | 1115 | 0        | 0.07143 | 0        | 0       | 0.33333 | 0        | 0.25    |
| B29R      | B29R-AT1          | + | 826  | 0        | 0       | 0        | 0       | 0       | 0.142857 | 0       |
|           | B29R-AT3          | + | 970  | 0        | 0       | 0.25     | 0       | 0       | 0        | 0       |
|           | B29R              | + | 1005 | 1        | 1       | 0.75     | 1       | 1       | 0.857143 | 1       |
